# Supplementary figures and images for: Exploring Microorganisms from Plastic-Polluted Sites: Unveiling Plastic Degradation and PHA Production Potential
Source: MDPI journal article supplement (doi:10.3390/microorganisms11122914), 2023-12-03

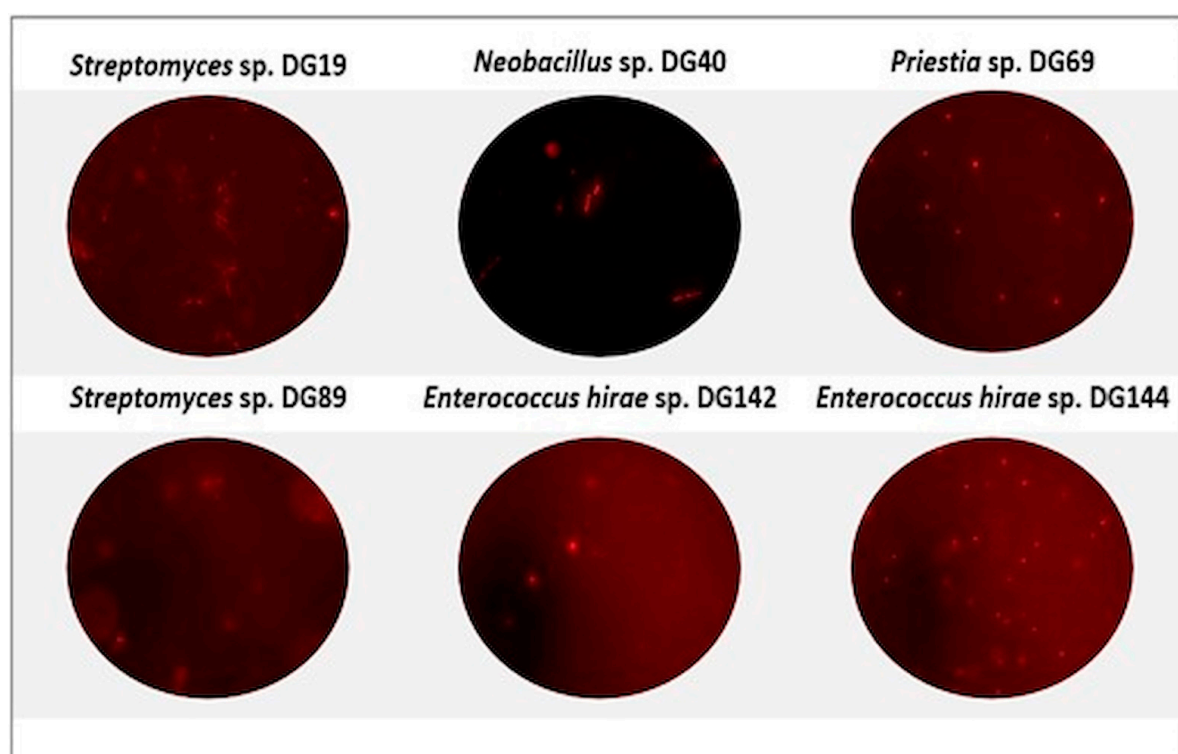

Figure S1: Visualization of PHA granules in isolates via confocal microscopy.

Supplement: s1 [file s1]
